# Supplementary material
Source: publisher figshare collection journal article supplement (https://acs.figshare.com/ndownloader/files/14112041)
Supplement: Supplementary file 1 [file 14112041]

**Fe3O4-Embedded and N-Doped Hierarchically Porous Carbon Nanospheres as High-Performance Lithium Ion Battery anodes**

*Jiayi Mao,a Dechao Niu*,a, Guangyu Jiang,a Nan Zheng,a Wenru Zhao,a Jianlin Shi, b Yongsheng Li*,a*

a Lab of Low-Dimensional Materials Chemistry, Key Laboratory for Ultrafine Materials of Ministry of Education, School of Materials Science and Engineering, East China University of Science and Technology, Shanghai 200237, China.

b State Key Laboratory of High Performance Ceramics and Superfine Microstructure, Shanghai Institute of Ceramics, Chinese Academy of Sciences, Shanghai 200050, China

*Corresponding Authors

E-mail: [dcniu@ecust.edu.cn](mailto:dcniu@ecust.edu.cn) (Dechao Niu), [ysli@ecust.edu.cn](mailto:ysli@ecust.edu.cn) (Yongsheng Li)

**Number of pages: 10 (Page S1-S10)**

**Number of figures: 10 (Figure S1- S10)**

**Number of tables: 3 (Table S1-S3)**


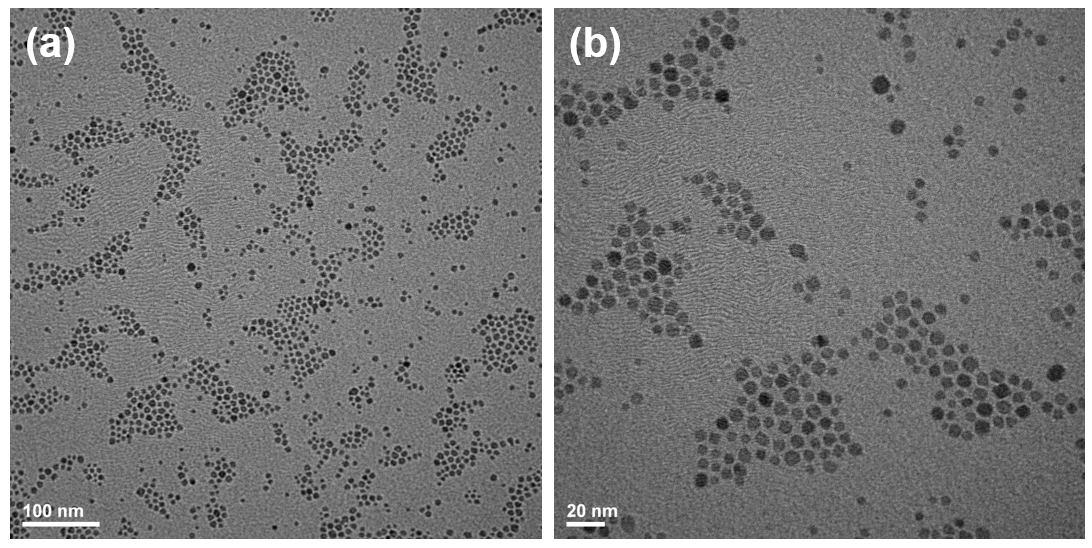


**Figure S1.** TEM images of the monodispersed, 6 nm sized Fe3O4 nanoparticles.


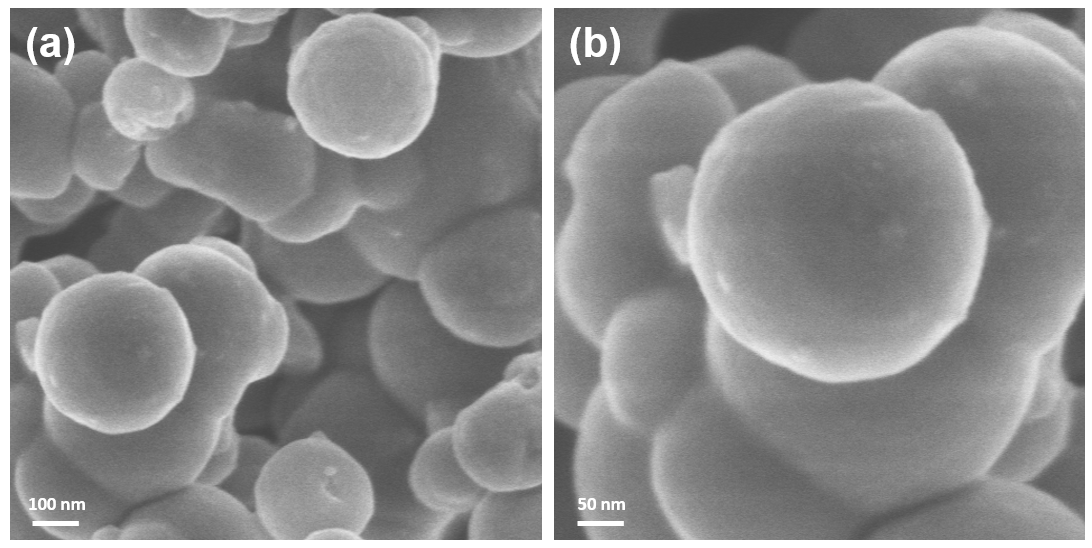


**Figure S2.** SEM images of Fe3O4@N-HPCNs


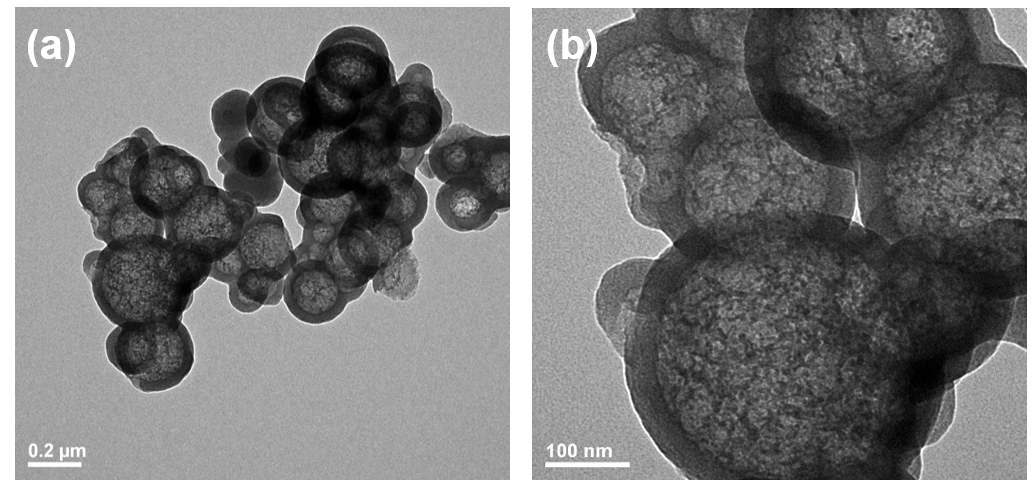


**Figure S3.** TEM images of N-HPCNs at different magnifications





**Figure S4.** N2 adsorption/desorption isotherms of Fe3O4@N-HPCNs and N-HPCNs


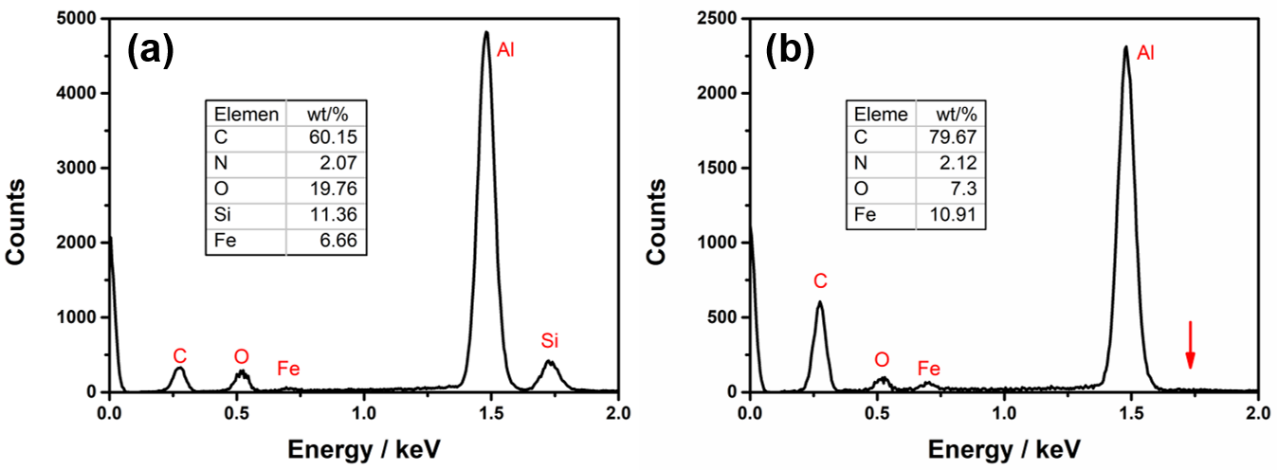


**Figure S5.** The EDS spectra of various elements for Fe3O4@N-HPCNs before (a) and after (b) the etching process.

**Table S1.** The BET surface areas, pore volumes and pore size distributions of Fe3O4@N-HPCNs and N-HPCNs.

| **Samples** | **Specific surface area (m2 g-1)** | **t-Plot micropore area**  **(m2 g-1)** | **Pore volume**  **(cm3 g-1)** | **Pore size (nm)** |
| --- | --- | --- | --- | --- |
| **Fe3O4@N-HPCNs** | 688.6 | 134.7 | 0.92 | 2.7&15.8 |
| **N-HPCNs** | 814.2 | 158.3 | 1.13 | 2.9&16.1 |





**Figure S6**. CV curves of the Fe3O4 anode.





**Figure S7**. CV curves of the N-HPCNs anode.





**Figure S8.** Cycling performance of Fe3O4@N-HPCNs 0.5 A g-1.





**Figure S9.** Cycling performances of N-HPCNs and Fe3O4 at 1 A g-1.

**Table S2.** Impedance Parameter Values Obtained by the Fitting of the Nyquist Plots in Figure 7b.

| **Samples** | **Re (Ω)** | **Rct (Ω)** | **CPE (μF)** | **Zw (Ω)** |
| --- | --- | --- | --- | --- |
| **Before cycling** | 1.676 | 90.34 | 14.93 | 30.45 |
| **20th cycle** | 6.863 | 178.83 | 86.64 | 67.09 |
| **100th cycle** | 2.918 | 98.53 | 227 | 11.51 |


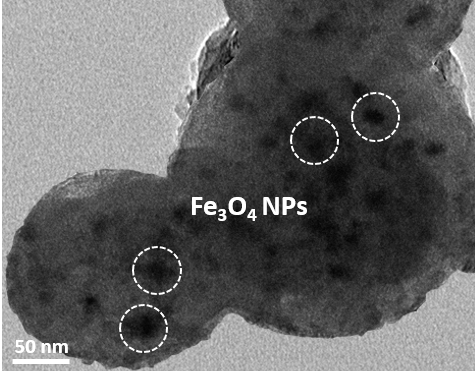


**Figure S10.** TEM image of the Fe3O4@N-HPCNs anode after 250 cycles.

**Table S3.** Comparison of the performances and Fe3O4 contents of various Fe3O4-based materials for LIBs reported in the literatures.

| **Fe3O4-based materials** | **Capacity (mAh g-1) at different current density** | **Fe3O4 content**  **(wt%)** | **Ref.** |
| --- | --- | --- | --- |
| **Fe3O4@ N-HPCNs** | ~1240 (100 cycles) at 0.1 A g-1  ~581 (400 cycles) at 1 A g-1 | ~20.12 | This work |
| **Hollow N-doped Fe3O4/Carbon Nanocages** | ~700 (100 cycles) at 0.2 A g-1 | ~70.13 | [1] |
| **Fe3O4@C Nanoparticles** | ~800 (100 cycles) at 0.1 A g-1  ~530 (350 cycles) at 1 A g-1 | ~89.1 | [2] |
| **Fe3O4@C yolk-shelled Nanocubes** | ~1100 (50 cycles) at 0.1 A g-1 | ~92.48 | [3] |
| **G- Fe3O4-GNRs** | ~787 (55 cycles) at 0.1 A g-1 | ~60 | [4] |
| **Sandwich-Structured Graphene- Fe3O4@C** | ~1200 (150 cycles) at 0.1 A g-1 | ~73.5 | [5] |
| **3D Fe3O4/macroporous Graphene** | ~712 (180 cycles) at 0.1 A g-1 | ~56.8 | [6] |
| **Fe3O4/N-doped Carbon/Nitrogen-doped Graphene** | ~905 (100 cycles) at 0.2 A g-1 | ~58.3 | [7] |
| **Fe3O4@C Nanoparticles** | ~1290(200 cycles) at 0.1 A g-1  ~520 (200 cycles) at 1 A g-1 | ~30 | [8] |
| **Fe3O4@PPy Nanocages** | ~950 (100 cycles) at 0.2 A g-1 | ~88.7 | [9] |
| **Fe3O4-Fe @ Bamboo-like Carbon Nanotubes** | ~764 (100 cycles) at 0.3 A g-1 | ~34 | [10] |
| **Fe3O4/C Composite** | ~1300 (100 cycles) at 0.1 A g-1 | ~67 | [11] |

**References**

(1) Wang, L.; Wu, J.; Chen, Y.; Wang, X.; Zhou, R.; Chen, S.; Guo, Q.; Hou, H.; Song, Y., Hollow Nitrogen-doped Fe3O4/Carbon Nanocages with Hierarchical Porosities as Anode Materials for Lithium-ion Batteries. *Electrochim. Acta* **2015**, *186*, 50-57, DOI 10.1016/j.electacta.2015.10.134.

(2) Ma, C.; Shi, J.; Zhao, Y.; Song, N.-j.; Wang, Y., A novel porous reduced microcrystalline graphene oxide supported Fe3O4@C nanoparticle composite as anode material with excellent lithium storage performances. *CHEM. ENG. J.* **2017**, *326,* 507-517, DOI 10.1016/j.cej.2017.05.180.

(3) Liu, Z.; Yu, X.-Y.; Paik, U., Etching-in-a-Box: A Novel Strategy to Synthesize Unique Yolk-Shelled Fe3O4@Carbon with an Ultralong Cycling Life for Lithium Storage. *Adv. Energy Mater.* **2016**,*6* (6), 1502318, DOI 10.1002/aenm.201502318.

(4) Li, L.; Kovalchuk, A.; Fei, H.; Peng, Z.; Li, Y.; Kim, N. D.; Xiang, C.; Yang, Y.; Ruan, G.; Tour, J. M., Enhanced Cycling Stability of Lithium-Ion Batteries Using Graphene-Wrapped Fe3O4-Graphene Nanoribbons as Anode Materials. *Adv. Energy Mater.* **2015**, *5*(14), 1500171, DOI 10.1002/aenm.201500171.

(5) Zhao, L.; Gao, M.; Yue, W.; Jiang, Y.; Wang, Y.; Ren, Y.; Hu, F., Sandwich-Structured Graphene-Fe3O4@Carbon Nanocomposites for High-Performance Lithium-Ion Batteries. *ACS Appl. Mater. Interfaces* **2015**, *7* (18), 9709-9715, DOI 10.1021/acsami.5b01503.

(6) Lu, X.; Wang, R.; Bai, Y.; Chen, J.; Sun, J., Facile preparation of a three-dimensional Fe3O4/macroporous graphene composite for high-performance Li storage. *J. Mater. Chem. A* **2015**, *3*, 12031–12037, DOI 10.1039/c5ta01803j.

(7) Luo, H.; Ji, D.; Yang, Z.; Huang, Y.; Xiong, G.; Zhu, Y.; Guo, R.; Wan, Y., An ultralight and highly compressible anode for Li-ion batteries constructed from nitrogen-doped carbon enwrapped Fe3O4 nanoparticles confined in a porous 3D nitrogen-doped graphene network. *Chem. Eng. J.* **2017**, *326*, 151-161, DOI 10.1016/j.cej.2017.05.102.

(8) He, Z.; Wang, K.; Zhu, S.; Huang, L. A.; Chen, M.; Guo, J.; Pei, S.; Shao, H.; Wang, J., MOF-Derived Hierarchical MnO-Doped Fe3O4@C Composite Nanospheres with Enhanced Lithium Storage. *ACS Appl. Mater. Interfaces* **2018**, *10* (13), 10974-10985, DOI 10.1021/acsami.8b01358.

(9) Liu, J.; Xu, X.; Hu, R.; Yang, L.; Zhu, M., Uniform Hierarchical Fe3O4@Polypyrrole Nanocages for Superior Lithium Ion Battery Anodes. *Adv. Energy Mater.* **2016**, *6* (13), 1600256, DOI 10.1002/aenm.201600256.

(10) Du, L.; Xu, C.; Liu, J.; Lan, Y.; Chen, P., One-step detonation-assisted synthesis of Fe3O4-Fe@BCNT composite towards high performance lithium-ion batteries. *Nanoscale* **2017**, *9* (38), 14376-14384, DOI 10.1039/c7nr05362b.

(11) Yang, Z.; Su, D.; Yang, J.; Wang, J., Fe3O4/C composite with hollow spheres in porous 3D-nanostructure as anode material for the lithium-ion batteries. *J. Power Sources* **2017**, *363*, 161-167, DOI 10.1016/j.jpowsour.2017.07.080.
